# Supplementary material for: Cultivation and visualization of a methanogen of the phylum Thermoproteota
Source: Research Square preprint supplement (doi:10.21203/rs.3.rs-2500102/v1), 2023-02-20
Supplement: Supplementary file 1 [file 06241aaa0ec159dfaad3a259.xlsx]

## Sheet: SOI Table 1
Supplementary Table 1. Summary of the Ca. M. yellowstonensis LCB70 genome, and Metagenome Assembled Genomes (MAGs) recovered from the enrichment metagenome.
Genome ID	Sequences (#)	Genome Size (Mbp)	GC (%)	Relative Abundance (%)	Completeness (%)	Contamination (%)	Strain heterogeneity (%)	GTDB-tk Taxonomic Assignment (GTDB release 95)
M. yellowstonensis LCB70	1	1.52	54.6	31.4033	100	0	0	d__Archaea;p__Thermoproteota;c__Methanomethylicia;o__Methanomethylicales;f__Methanomethylicaceae;g__Methanosuratus;s__Methanosuratus subterraneum
MAG ID	Sequences (#)	Genome Size (Mbp)	GC (%)	Relative Abundance (%)	Completeness (%)	Contamination (%)	Strain heterogeneity (%)	GTDB-tk Taxonomic Assignment (GTDB release 95)
R2-1	163	2.27477	44.2357	12.4387	96.73	5.19	46.15	d__Bacteria;p__Firmicutes_B;c__Syntrophomonadia;o__Thermacetogeniales;f__;g__;s__
R2-2	138	1.84291	49.9378	11.8623	94.83	0	0	d__Bacteria;p__Thermotogota;c__Thermotogae;o__Thermotogales;f__Thermotogaceae;g__Pseudothermotoga_A;s__
R2-3	65	1.92055	38.9391	9.70555	98.25	3.51	50	d__Bacteria;p__Thermotogota;c__Thermotogae;o__Thermotogales;f__Fervidobacteriaceae;g__Fervidobacterium;s__Fervidobacterium pennivorans_A
R2-4	159	1.65147	40.749	6.75816	96.61	0	0	d__Bacteria;p__WOR-3;c__Hydrothermia;o__UBA1063;f__UBA1063;g__;s__
R2-5	64	3.48107	56.5969	9.51801	92.73	9	7.69	d__Bacteria;p__Chloroflexota;c__Anaerolineae;o__Anaerolineales;f__Anaerolineaceae;g__Thermanaerothrix;s__
R2-6	87	2.32257	38.1667	5.76652	97.27	2.42	0	d__Bacteria;p__Nitrospirota;c__Thermodesulfovibrionia;o__Thermodesulfovibrionales;f__Thermodesulfovibrionaceae;g__Thermodesulfovibrio;s__Thermodesulfovibrio sp002339325
R2-7	163	1.37049	49.2395	1.29134	91.59	0.93	100	d__Archaea;p__Thermoproteota;c__Methanomethylicia;o__Methanomethylicales;f__Methanomethylicaceae;g__WYZ-LMO10;s__WYZ-LMO10 sp004347955
R2-8	922	3.34155	32.2034	0.885755	56.41	26.19	0	d__Bacteria;p__Nitrospirota;c__Thermodesulfovibrionia;o__Thermodesulfovibrionales;f__Thermodesulfovibrionaceae;g__;s__
R2-9	174	1.60469	45.9692	0.836255	97.01	1.31	50	d__Archaea;p__Halobacteriota;c__Archaeoglobi;o__Archaeoglobales;f__Archaeoglobaceae;g__WYZ-LMO2;s__WYZ-LMO2 sp004347865
R2-10	712	3.34091	59.5565	0.775108	87.69	1.95	100	d__Bacteria;p__Armatimonadota;c__HRBIN16;o__HRBIN16;f__HRBIN16;g__HRBIN16;s__
R2-11	355	1.75678	38.3864	1.74618	88.85	5.41	28.57	d__Archaea;p__Thermoproteota;c__Nitrososphaeria;o__;f__;g__;s__
R2-12	15	1.55926	40.9	0.668909	99.2	0	0	d__Archaea;p__Methanobacteriota;c__Methanobacteria;o__Methanobacteriales;f__Methanothermobacteraceae_A;g__Methanothermobacter_A;s__
R2-13	60	1.92257	48.9628	0.697677	97.73	12	50	d__Archaea;p__Methanobacteriota;c__Methanobacteria;o__Methanobacteriales;f__Methanothermobacteraceae;g__Methanothermobacter;s__
R2-14	528	3.28786	56.4366	0.657381	87.5	5.74	50	d__Bacteria;p__Armatimonadota;c__SYMT01;o__;f__;g__;s__
R2-15	422	2.09051	40.1292	0.591417	86.6	1.72	100	d__Bacteria;p__Dictyoglomota;c__;o__;f__;g__;s__
R2-16	141	1.2522	50.4334	0.486543	81.54	4.35	88.89	d__Archaea;p__Methanobacteriota;c__Methanobacteria;o__Methanobacteriales;f__Methanothermobacteraceae;g__Methanothermobacter;s__
R2-17	804	3.11745	50.1587	0.411118	72.29	7.87	0	d__Bacteria;p__Armatimonadota;c__UBA5829;o__UBA5829;f__UBA5829;g__;s__
R2-18	142	1.59622	44.3369	0.379789	98.39	0.81	100	d__Archaea;p__Thermoplasmatota;c__Thermoplasmata;o__Methanomassiliicoccales;f__;g__;s__
R2-19	169	1.42092	48.1285	0.369245	92.48	0.95	66.67	d__Archaea;p__Thermoproteota;c__Thermoproteia;o__Desulfurococcales;f__NBVN01;g__Zestosphaera;s__
R2-20	61	1.70295	37.4085	0.347588	98.75	0.06	50	d__Bacteria;p__Desulfobacterota;c__Thermodesulfobacteria;o__Thermodesulfobacteriales;f__Thermodesulfobacteriaceae;g__Thermodesulfobacterium;s__Thermodesulfobacterium commune
R2-21	513	1.81935	64.7117	0.345489	57.9	0	0	d__Bacteria;p__Chloroflexota;c__Anaerolineae;o__B4-G1;f__;g__;s__
R2-22	185	1.43867	28.0132	0.367935	95.54	1.79	100	d__Bacteria;p__Caldisericota;c__Caldisericia;o__B22-G15;f__B22-G15;g__;s__
R2-23	225	2.19684	58.7068	0.284643	93.04	1.42	0	d__Bacteria;p__DTU030;c__DTU030;o__DTU030;f__;g__;s__
R2-24	183	1.24553	46.7927	0.244146	90.82	1.34	66.67	d__Archaea;p__Thermoproteota;c__Thermoproteia;o__Desulfurococcales;f__Desulfurococcaceae;g__Thermosphaera;s__Thermosphaera aggregans
R2-25	428	1.88065	46.9689	0.210123	75.29	0	0	d__Bacteria;p__Armatimonadota;c__UBA10988;o__;f__;g__;s__
R2-26	124	1.12111	43.8743	0.191285	86.71	2.43	40	d__Archaea;p__Thermoproteota;c__Thermoproteia;o__Desulfurococcales;f__Fervidicoccaceae;g__;s__
R2-27	315	1.13823	56.1933	0.152308	56.63	0	0	d__Bacteria;p__Caldatribacteriota;c__Caldatribacteriia;o__Caldatribacteriales;f__Caldatribacteriaceae;g__Caldatribacterium;s__
R2-28	382	1.17248	63.3102	0.132115	28.06	0.15	100	d__Bacteria;p__Chloroflexota;c__Anaerolineae;o__UBA4142;f__;g__;s__
R2-29	107	0.695525	30.0566	0.136161	45.26	7.08	84.21	d__Bacteria;p__Desulfobacterota;c__Thermodesulfobacteria;o__Thermodesulfobacteriales;f__Thermodesulfobacteriaceae;g__Thermodesulfobacterium;s__Thermodesulfobacterium geofontis
R2-30	280	0.920941	33.4948	0.103056	36.99	8.55	9.38	d__Bacteria;p__Nitrospirota;c__Thermodesulfovibrionia;o__Thermodesulfovibrionales;f__Thermodesulfovibrionaceae;g__Thermodesulfovibrio;s__
R2-31	29	0.439954	30.5248	0.083695	33.4	0	0	d__Bacteria;p__Desulfobacterota;c__Thermodesulfobacteria;o__Thermodesulfobacteriales;f__Thermodesulfobacteriaceae;g__Thermodesulfobacterium;s__
R2-32	235	0.785393	43.3591	0.106534	20.27	0.31	0	d__Bacteria;p__Armatimonadota;c__UBA5829;o__UBA5829;f__;g__;s__
R2-33	125	0.334991	67.4666	0.04572	18.95	0	0	d__Bacteria;p__Deinococcota;c__Deinococci;o__Deinococcales;f__Thermaceae;g__Thermus;s__

## Sheet: SOI Table 2
Supplementary Table 2. List of annotated genes in the strain LCB70 genome used to build Figure 3.
Category/Gene Abbreviation	Gene Product Name	IMG Gene IDs
Methyl Coenzmye M reductase complex
mcrA	methyl-coenzyme M reductase alpha subunit	Ga0589457_01_1257137_1258807
mcrB	methyl-coenzyme M reductase beta subunit	Ga0589457_01_1254939_1256345
mcrG	methyl-coenzyme M reductase gamma subunit	Ga0589457_01_1256347_1257123
mcrC	methyl-coenzyme M reductase subunit C	Ga0589457_01_1284127_1284786
mcrD	methyl-coenzyme M reductase subunit D	Ga0589457_01_1283796_1284125
mcrA2	methyl coenzyme M reductase system, component A2	Ga0589457_01_1261479_1263104, Ga0589457_01_1278635_1280314
Methyltransferases
mtaA	[methyl-Co(III) methanol-specific corrinoid protein]:coenzyme M methyltransferase	Ga0589457_01_217397_218506, Ga0589457_01_966484_967509
mtaB	methanol---5-hydroxybenzimidazolylcobamide Co-methyltransferase	Ga0589457_01_210587_211975
mtaC	methanol corrinoid protein	Ga0589457_01_211987_212814
mtmB	methylamine---corrinoid protein Co-methyltransferase	Ga0589457_01_1355189_1356565, Ga0589457_01_1356580_1357947
mtbC	di/trimethylamine corrinoid protein	Ga0589457_01_965799_966491, Ga0589457_01_1357944_1358603
Energy Conservation
HdrD	heterodisulfide reductase subunit D	Ga0589457_01_1303410_1304651, Ga0589457_01_64437_65156, Ga0589457_01_69031_70167
LldG	L-lactate dehydrogenase complex protein LldG	Ga0589457_01_63139_64440
GlcD	Putative lactate dehydrogenase	Ga0589457_01_1301936_1303396
hdrC	heterodisulfide reductase subunit C	Ga0589457_01_207325_207681
hdrB	heterodisulfide reductase subunit B	Ga0589457_01_206414_207313
Ehd [NiFe] Hydrogenase	Ehd [NiFe] hydrogenase catalytic subunit	Ga0589457_01_204704_206413
EhiD	Ehi [NiFe] hydrogenase catalytic subunit	Ga0589457_01_144638_145771
Ehb [NiFe] Hydrogenase	Ehb [NiFe] hydrogenase catalytic subunit	Ga0589457_01_422873_424054
HydA Sulfhydrogenase	Group 3b [NiFe] hydrogenase catalytic subunit	Ga0589457_01_1505304_1506698
HppA	H+/Na+/K+ translocating membrane pyrophosphatase	Ga0589457_01_44249_46309
AtpA	V/A-type H+/Na+-transporting ATPase subunit A	Ga0589457_01_418832_420595
AtpB	V/A-type H+/Na+-transporting ATPase subunit B	Ga0589457_01_417453_418832
AtpC	V/A-type H+/Na+-transporting ATPase subunit C	Ga0589457_01_413417_414343
AtpD	V/A-type H+/Na+-transporting ATPase subunit D	Ga0589457_01_416802_417443
AtpE	V/A-type H+/Na+-transporting ATPase subunit E	Ga0589457_01_420601_421224
AtpF	V/A-type H+/Na+-transporting ATPase subunit F	Ga0589457_01_421221_421520
AtpH	V/A-type H+/Na+-transporting ATPase subunit H	Ga0589457_01_414333_416261
AtpI	V/A-type H+/Na+-transporting ATPase subunit I	Ga0589457_01_414333_416261
AtpK	V/A-type H+/Na+-transporting ATPase subunit K	Ga0589457_01_416286_416648
MnhA	Multisubunit Na+/H+ antiporter subunit A	Ga0589457_01_857291_859216
MnhD	Multisubunit Na+/H+ antiporter subunit D	Ga0589457_01_859213_860652, Ga0589457_01_863147_864706
MnhE	Multisubunit Na+/H+ antiporter subunit E	Ga0589457_01_860657_861148
MnhF	Multisubunit Na+/H+ antiporter subunit F	Ga0589457_01_861145_861414
MnhG	Multisubunit Na+/H+ antiporter subunit G	Ga0589457_01_861377_861757
MnhB-like	MnhB-related membrane protein	Ga0589457_01_861754_862005
MnhB	Multisubunit Na+/H+ antiporter subunit B	Ga0589457_01_862002_862772
MnhC	Multisubunit Na+/H+ antiporter subunit C	Ga0589457_01_862779_863150

## Sheet: SOI Table 3
Supplementary Table 3. List of single marker copy genes used in phylogenomic analyses.
arCOG	Protein ID	arCOG Description
arCOG00785	RpmC	Ribosomal protein L29
arCOG01001	Map	Methionine aminopeptidase
arCOG01227	FtsY	Signal recognition particle GTPase
arCOG01559	FusA	Translation elongation factor G, EF-G (GTPase)
arCOG01722	RpsM/rps13p	Ribosomal protein S13
arCOG04050	FEN1	5'-3' exonuclease (including N-terminal domain of PolI)
arCOG04067	RplB	Ribosomal protein L2
arCOG04070	RplC	Ribosomal protein L3
arCOG04071	RplD	Ribosomal protein L4
arCOG04072	RplW	Ribosomal protein L23
arCOG04086	RpmD	Ribosomal protein L30
arCOG04087	RpsE	Ribosomal protein S5
arCOG04088	RplR	Ribosomal protein L18
arCOG04090	RplF/rpl6p	Ribosomal protein L6P
arCOG04091	RpsH/rps8p	Ribosomal protein S8
arCOG04092	RplE/rpl5p	Ribosomal protein L5
arCOG04094	RplX/rpl24p	Ribosomal protein L24
arCOG04095	RplN/rps14p	Ribosomal protein L14
arCOG04096	RpsQ/rps17p	Ribosomal protein S17
arCOG04097	RpsC/rps3p	Ribosomal protein S3
arCOG04098	RplV/rpl22p	Ribosomal protein L22
arCOG04099	RpsS/rps19p	Ribosomal protein S19
arCOG04169	SecY	Preprotein translocase subunit SecY
arCOG04223	SUI1	Translation initiation factor 1 (eIF-1/SUI1)
arCOG04239	RpsD/rps4p	Ribosomal protein S4 or related protein
arCOG04240	RpsK/rps11p	Ribosomal protein S11
arCOG04241	RpoA/Rpo1/rpoD	DNA-directed RNA polymerase subunit D
arCOG04242	RplM/rpl13p	Ribosomal protein L13
arCOG04243	RpsI/rps9p	Ribosomal protein S9
arCOG04245	RpsB/rps2p	Ribosomal protein S2
arCOG04254	RpsG/rps7p	Ribosomal protein S7
arCOG04288	RplJ	Ribosomal protein L10
arCOG04289	RplA/rpl1p	Ribosomal protein L1

## Sheet: SOI Table 4
Supplementary Table 4. FISH probes used in this study
Probe	Probe sequence (5'-3')	Specificity	Target site1	FA2	Probe label3	Reference
Msur657	CCCTCAACCTCTCCCGCC	Methanomethyliaceae	657	35	DOPE	This Study
Arch915	GTGCTCCCCCGCCAATTCCT	Most Archaea	915	35	DOPE	Stahl & Amann, 1999
NONEUB338-I	ACTCCTACGGGAGGCAGC	Control probe	338	35	DOPE	Wallner et al., 1993
1, Position in E. coli 16S rRNA
2, formamide concentration (v/v) in hybridization buffer
3, DOPE, double-labelled oligonucleotide probe
